# Supplementary material for: Mouse Transgenesis Identifies Conserved Functional Enhancers and cis-Regulatory Motif in the Vertebrate LIM Homeobox Gene Lhx2 Locus
Source: PLoS One. 2011 May 23;6(5):e20088. doi: 10.1371/journal.pone.0020088 (PMC3100342; doi:10.1371/journal.pone.0020088)
Supplement: Figure S9 — Human-mouse-fugu alignment and predicted TFBS of CNE2 . (PDF) [file pone.0020088.s011.pdf]

# Figure S9. Human-mouse-fugu alignment and predicted TFBS of *CNE2*.

TFBS on the forward strand are shown in blue and TFBS on the reverse strand are shown in red below the human-mouse-fugu sequence alignment. The binding TF and position weight matrix similarity score are listed next to each predicted site. Sequences enclosed in blue (forward strand) or red (reverse strand) boxes are instances of motifs over-represented in the CNEs of central nervous system-expressed TF-encoding genes. Motif numbers are listed and described in Table 3.

|       |                                                               | Motif #4                | Motif #2            |     |
|-------|---------------------------------------------------------------|-------------------------|---------------------|-----|
| human | ATTGTTTCCTTAGCGGTATACATGCTTCATTCT                             | AGTAATTAG               | CTGTCAGAGAGGACCCGAC | 60  |
| mouse | ATTGTTTCCTGAGTGGTATACACACTTCATTCTAGTAATTAGCTGTCAGAGAGGACCCGAC |                         |                     | 60  |
| fugu  | ATTGTTCTCTATCACTGGACAAGGCTGATTCTGTAAATTAGCTGTCAGCACAGAGCCCTC  |                         |                     | 60  |
|       |                                                               | tcaattctagTAATtagc      | 0.997 S8.01         |     |
|       |                                                               | attctagTAATtagctgtc     | 0.925 BRN3.02       |     |
|       |                                                               | attctagtaATTAgctg       | 0.968 GSH2.01       |     |
|       |                                                               | ctagTAATtagctgtca       | 0.958 GSH2.01       |     |
|       |                                                               | agtaATTAgctgtcaga       | 0.992 S8.01         |     |
|       |                                                               | agctGTCagag             | 1 TGIF.01           |     |
| human | AGCAGCTTAATGTTGTCCGCTCAAATCATATTAATGAAATGCAATCCACTCAAATGTCCT  |                         |                     | 120 |
| mouse | AGCAGCCTAATGTTGTCCGCTCCAATCATATTAATGAAATGCAATCCACTCAGATGTCCT  |                         |                     | 120 |
| fugu  | AGCAGCTTAGTGCTGTCCGCTCAAATCAAATAATGAAATGCAATCCACTCAAATGTCCT   |                         |                     | 120 |
|       |                                                               | tcaAATCatattaat         | 0.901 GFII.02       |     |
|       |                                                               | tcaaatcaTATTaatt        | 0.941 SATB1.01      |     |
|       |                                                               | aatGCAAtccac            | 0.942 CHOP.01       |     |
|       |                                                               | aatcCACTcaaatgt         | 0.97 NKX32.01       |     |
| human | GAATGCATATCTGTAA-----TTGCGTTAAGCAGAGAGG                       |                         |                     | 154 |
| mouse | GAATGCATATCTGTAA-----TTGCATTAAGCAGAGAGA                       |                         |                     | 154 |
| fugu  | GGATGCATATCTGTAACAGGCCTGCACACACGAGAGCGG                       |                         |                     | 159 |
|       |                                                               | atgcaTATCtgta           | 0.943 GATA.01       |     |
|       |                                                               | gcataatctgTAA-----Ttgcg | 0.994 S8.01         |     |
