# Supplementary material for: Mouse Transgenesis Identifies Conserved Functional Enhancers and cis-Regulatory Motif in the Vertebrate LIM Homeobox Gene Lhx2 Locus
Source: PubMed Central journal article supplement (PMC3100342; doi:10.1371/journal.pone.0020088), 2011-05-23
Supplement: pone.0020088.s001.pdf [file pone.0020088.s001.pdf]

**Table S1. Primer sequences of the eight CNE constructs.**

The sequences were amplified from mouse genomic DNA by PCR. Leading attB1/attB2 sites for Gateway cloning are not shown.

| <b>CNE construct</b> | <b>Length of amplified sequence (bp)</b> | <b>Forward primer (5' to 3')</b>      | <b>Reverse primer (5' to 3')</b>   |
|----------------------|------------------------------------------|---------------------------------------|------------------------------------|
| CNE1                 | 279                                      | GCT GCT CCA GGA TCG<br>TGC TG         | CAG AGC GAA GAC CCT<br>GTG TG      |
| CNE2/3               | 498                                      | AGA CTC TAG CCC ATC<br>TCA TTC TTC    | CCA GCA TTT ACT TTG<br>ACA TCT CTG |
| CNE4                 | 397                                      | GCT TGG AGC CAA GAG<br>AAA ATG        | CTT GCT CAG GTC TGC<br>CTT GTA C   |
| CNE5/6               | 719                                      | CTC CGA TGT GTT GGT<br>CCC AGC CAG    | GAG CTG TCT GCA CTG<br>TTC AGT GTG |
| CNE7                 | 305                                      | GAG TAC CAG GCA GTC<br>AAT CAT GAG    | GCT GGG AAG CCT TGT<br>CTA ATC CTG |
| CNE8                 | 382                                      | GAC TCT GTA TTG TGG<br>CTA CAG ATC    | TGA CAT AGC CTG TGG<br>CTG TGA TAG |
| CNE9                 | 261                                      | GTG GTC TGA CTG TGT<br>CAC AG         | CTG TCA CGG AAG TAA<br>TGC AG      |
| CNE10                | 479                                      | GTG CTT TAC TTT TTG<br>TCT TTG GTT CC | TAT TGA AGG CAA TTT<br>GCA GCT GGC |
