# Supplementary material for: Mouse Transgenesis Identifies Conserved Functional Enhancers and cis-Regulatory Motif in the Vertebrate LIM Homeobox Gene Lhx2 Locus
Source: PubMed Central journal article supplement (PMC3100342; doi:10.1371/journal.pone.0020088), 2011-05-23
Supplement: pone.0020088.s002.pdf [file pone.0020088.s002.pdf]

**Table S2. Over-represented 8-mer motifs in CNEs of genes of clusters #1, 2, 4, 5 and 6.**

Human-fugu CNEs of human transcription factor-encoding genes in each cluster were compared against CNEs of genes in other clusters. Number of instances of each motif was determined by searching each motif in the human-fugu CNEs permitting at most 2 mismatches. *P*-values were calculated based on a chi-squared test followed by Bonferroni correction for multiple testing.

| Cluster no. | Motif no. | Motif (and reverse-complement) | No. of instances | <i>P</i> -value        |
|-------------|-----------|--------------------------------|------------------|------------------------|
| 1           | 1         | CGATTAAC (GTTAATCG)            | 110              | $2.68 \times 10^{-7}$  |
|             | 2         | CGCAATTA (TAATTGCG)            | 155              | $2.09 \times 10^{-6}$  |
|             | 3         | CGATTGAT (ATCAATCG)            | 124              | $2.08 \times 10^{-5}$  |
|             | 4         | CATTAATC (GATTAATG)            | 129              | $5.57 \times 10^{-4}$  |
| 2           | 1         | GTTTGCGT (ACGCAAAC)            | 42               | $4.68 \times 10^{-39}$ |
|             | 2         | AGCAGGCG (CGCCTGCT)            | 21               | $1.02 \times 10^{-5}$  |
|             | 3         | TTTACACG (CGTGTAAC)            | 29               | $3.55 \times 10^{-5}$  |
|             | 4         | GCGGGAAA (TTCCCGC)             | 21               | $4.09 \times 10^{-5}$  |
| 4           | 1         | AATTAATT (AATTAATT)            | 120              | $2.55 \times 10^{-20}$ |
|             | 2         | GATTAATT (AATTAATC)            | 98               | $5.08 \times 10^{-9}$  |
| 5           | 1         | CGGCTGTT (AACAGCCG)            | 29               | $6.26 \times 10^{-10}$ |
|             | 2         | CGCTAATG (CATTAGCG)            | 29               | $3.06 \times 10^{-9}$  |
|             | 3         | AATAGCCG (CGGCTATT)            | 24               | $9.75 \times 10^{-9}$  |
|             | 4         | GCTGT TAA (TTAACAGC)           | 33               | $1.35 \times 10^{-7}$  |
|             | 5         | TAAACAGC (GCTGT TTA)           | 29               | $4.90 \times 10^{-4}$  |
|             | 6         | TTAATTGC (GCAATTAA)            | 45               | $1.57 \times 10^{-3}$  |
|             | 7         | AACAGCGG (CCGCTGTT)            | 19               | $5.75 \times 10^{-3}$  |
|             | 8         | GCTGT TGA (TCAACAGC)           | 23               | $6.83 \times 10^{-3}$  |
|             | 9         | TAACAGCG (CGCTGT TTA)          | 17               | $7.05 \times 10^{-3}$  |
|             | 10        | CGCTATTA (TAATAGCG)            | 18               | $8.18 \times 10^{-3}$  |
|             | 11        | GCCGTAAT (ATTACGGC)            | 17               | $8.35 \times 10^{-3}$  |
|             | 12        | CGTTTAAT (ATTAAACG)            | 60               | $9.18 \times 10^{-3}$  |
| 6           | 1         | TCAATCGG (CCGATTGA)            | 58               | $1.38 \times 10^{-6}$  |
|             | 2         | GCCGTAAT (ATTACGGC)            | 62               | $7.50 \times 10^{-4}$  |
