# Supplementary material for: Mouse Transgenesis Identifies Conserved Functional Enhancers and cis-Regulatory Motif in the Vertebrate LIM Homeobox Gene Lhx2 Locus
Source: PubMed Central journal article supplement (PMC3100342; doi:10.1371/journal.pone.0020088), 2011-05-23

**Figure S1. *CNE1* does not act as a transcriptional enhancer at E11.5.**

Ventral, lateral and dorsal views of three transgenic embryos of *CNE1-pHsp68-lacZ* construct. (A) *lacZ* expresses almost ubiquitously in the dorso-posterior regions of the embryo, and only in the ventral regions of the forebrain, midbrain and hindbrain. (B) *lacZ* expression is detected in the hindbrain, dorsal root ganglia (red arrows) and neural tube. (C) Barely noticeable *lacZ* expression in dorsal root ganglia (red arrows). Scale bar denotes 1 mm in length.

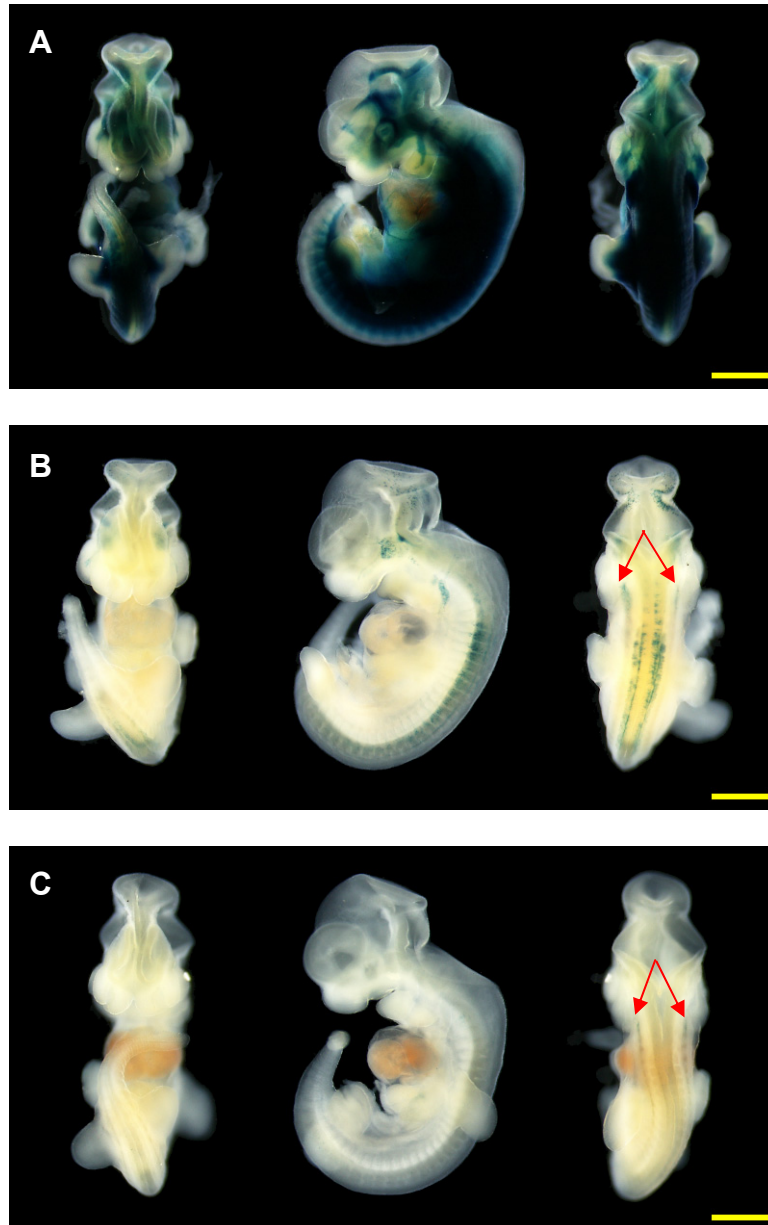

Supplement: pone.0020088.s003.pdf [file pone.0020088.s003.pdf]
