# Supplementary material for: Mouse Transgenesis Identifies Conserved Functional Enhancers and cis-Regulatory Motif in the Vertebrate LIM Homeobox Gene Lhx2 Locus
Source: PubMed Central journal article supplement (PMC3100342; doi:10.1371/journal.pone.0020088), 2011-05-23

**Figure S2. *CNE2/3* directs reporter gene expression in the neural tube and dorsal root ganglia at E11.5.**

Ventral, lateral and dorsal views of three transgenic embryos of *CNE2/3-pHsp68-lacZ* construct. (A) *lacZ* expresses strongly in the hindbrain, neural tube and dorsal root ganglia. (B) *lacZ* expression in the neural tube, dorsal root ganglia and also the dorsal medial regions of the telencephalon, diencephalon and midbrain. (C) *lacZ* expression in the neural tube and dorsal root ganglia. Scale bar denotes 1 mm in length.

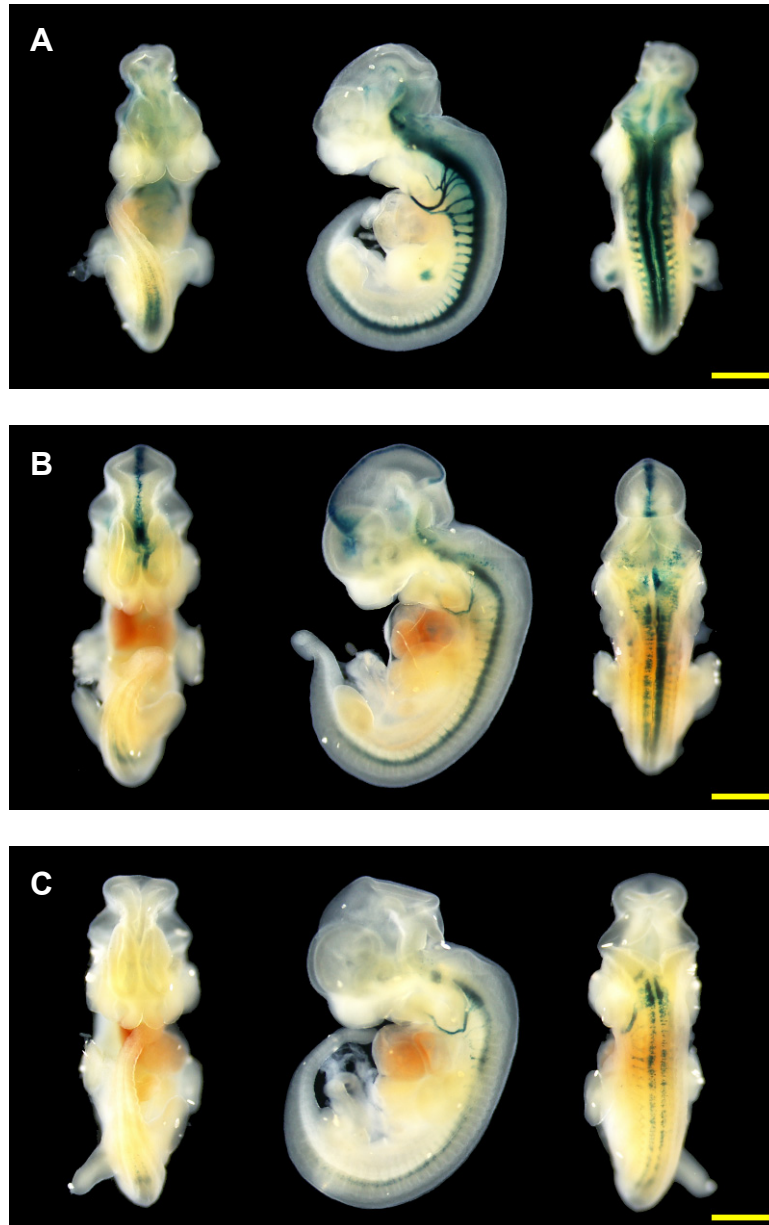

Supplement: pone.0020088.s004.pdf [file pone.0020088.s004.pdf]
