# Supplementary material for: Mouse Transgenesis Identifies Conserved Functional Enhancers and cis-Regulatory Motif in the Vertebrate LIM Homeobox Gene Lhx2 Locus
Source: PubMed Central journal article supplement (PMC3100342; doi:10.1371/journal.pone.0020088), 2011-05-23

**Figure S4. *CNE7* directs reporter gene expression in the hindbrain and neural tube at E11.5.**

Ventral, lateral and dorsal views of two transgenic embryos of *CNE7-pHsp68-lacZ* construct. (A) *lacZ* expression in the hindbrain and neural tube. (B) *lacZ* expression is observed not only in the hindbrain and neural tube, but also ectopically in the liver and stomach. Scale bar denotes 1 mm in length.

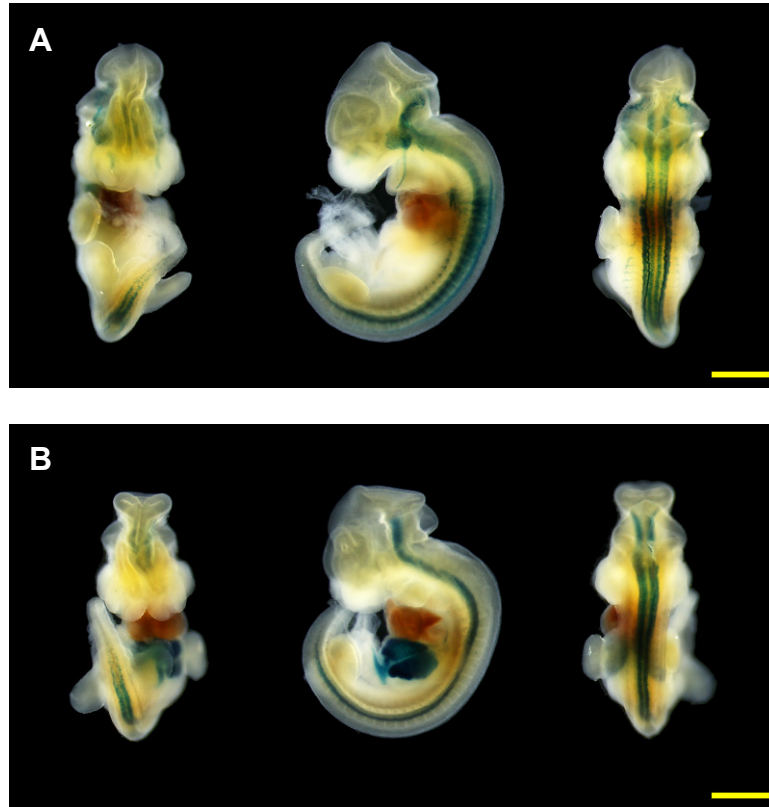

Supplement: pone.0020088.s006.pdf [file pone.0020088.s006.pdf]
