# Supplementary material for: Mouse Transgenesis Identifies Conserved Functional Enhancers and cis-Regulatory Motif in the Vertebrate LIM Homeobox Gene Lhx2 Locus
Source: PubMed Central journal article supplement (PMC3100342; doi:10.1371/journal.pone.0020088), 2011-05-23

**Figure S5. *CNE8* does not act as an enhancer at E11.5.**

Ventral, lateral and dorsal views of two transgenic embryos of *CNE8-pHsp68-lacZ* construct. (A, B) Both embryos exhibited ectopic *lacZ* expression in various anatomical structures with no reproducible similarities. Scale bar denotes 1 mm in length.

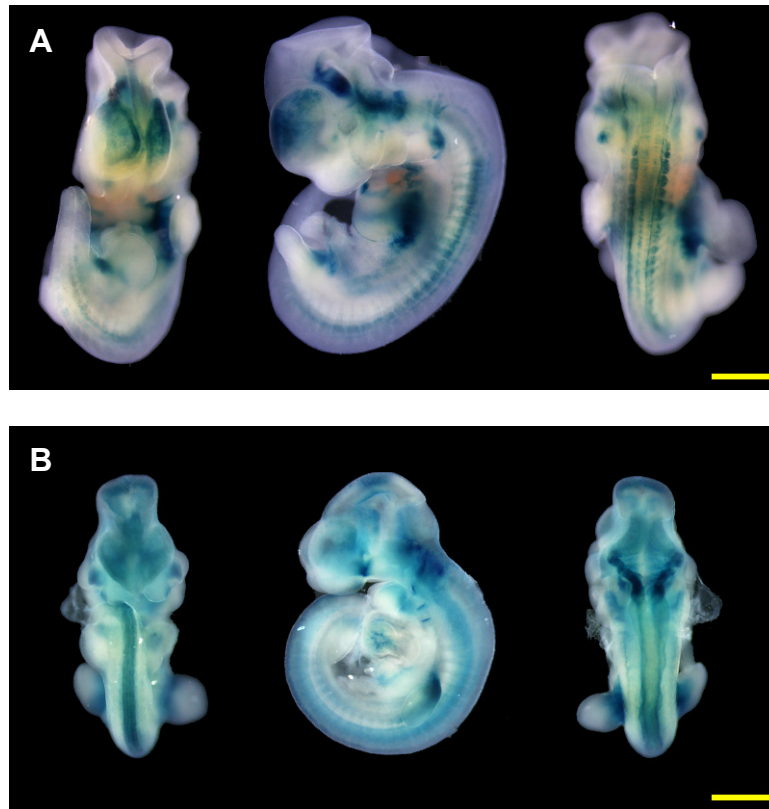

Supplement: pone.0020088.s007.pdf [file pone.0020088.s007.pdf]
