# Supplementary material for: Mouse Transgenesis Identifies Conserved Functional Enhancers and cis-Regulatory Motif in the Vertebrate LIM Homeobox Gene Lhx2 Locus
Source: PubMed Central journal article supplement (PMC3100342; doi:10.1371/journal.pone.0020088), 2011-05-23

**Figure S6. *CNE9* does not act as an enhancer at E11.5.**

Ventral, lateral and dorsal views of all four transgenic embryos of *CNE9-pHsp68-lacZ* construct that exhibit *lacZ* expression. (A – D) All embryos exhibited ectopic *lacZ* expression in various anatomical structures with no reproducible similarities. Scale bar denotes 1 mm in length.

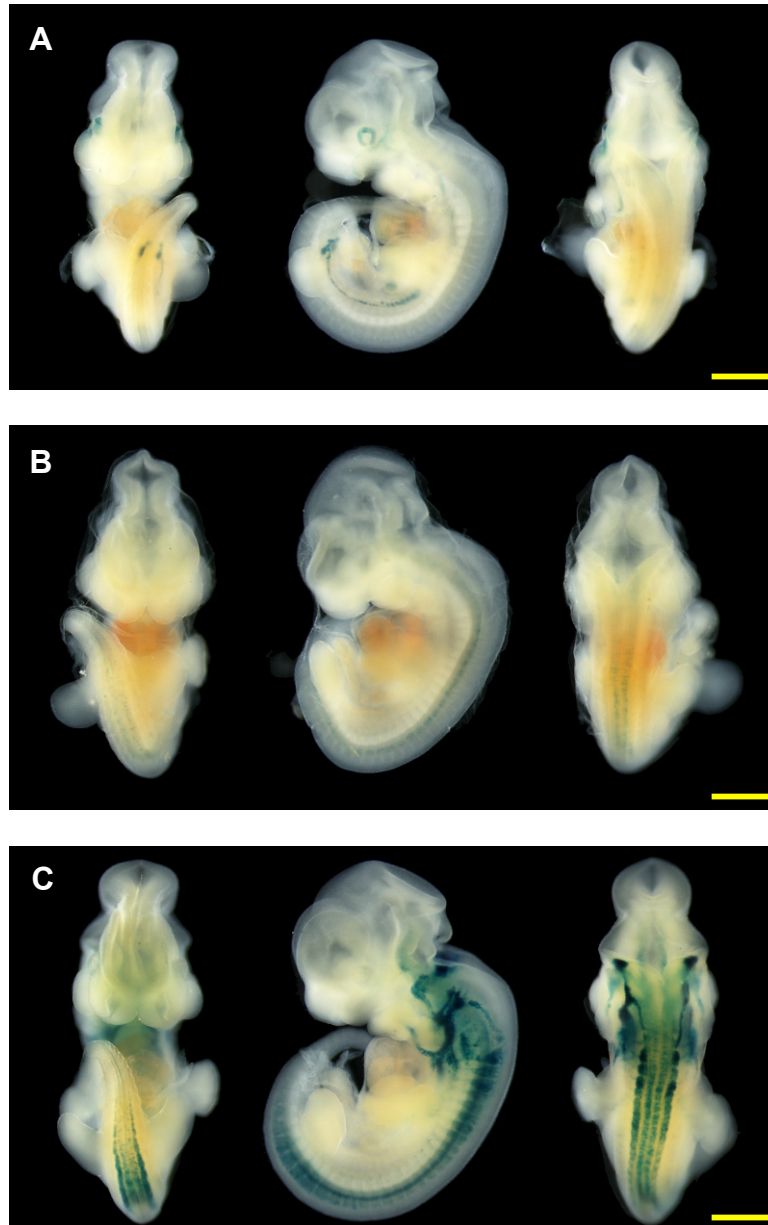

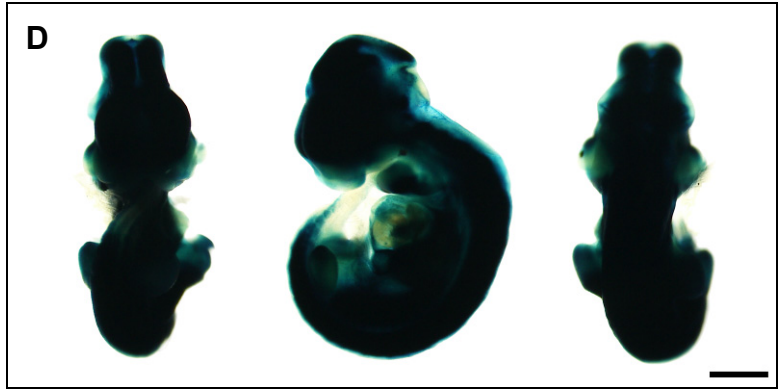

Supplement: pone.0020088.s008.pdf [file pone.0020088.s008.pdf]
