# Supplementary material for: Mouse Transgenesis Identifies Conserved Functional Enhancers and cis-Regulatory Motif in the Vertebrate LIM Homeobox Gene Lhx2 Locus
Source: PubMed Central journal article supplement (PMC3100342; doi:10.1371/journal.pone.0020088), 2011-05-23
Supplement: pone.0020088.s010.pdf [file pone.0020088.s010.pdf]

**Figure S8. Human-mouse-fugu alignment and predicted TFBS of *CNE1*.**

TFBS on the forward strand are shown in blue and TFBS on the reverse strand are shown in red below the human-mouse-fugu sequence alignment. The binding TF and position weight matrix similarity score are listed next to each predicted site.

```

human  AGCACGTCACGCTGGCCC-----AAAATGAAATGCTGACAAATGTAGATATTTCAAATTT 55
mouse  CGCACGTCACGCTGGCCC-----GAAATGAAGTGCTGACAAATGTAGATGTTTCAAATTT 55
fugu   AGCACCTTATAATGGGCCAGCACAAATGGTATGTTGACAAATGCAGATATTTCAAATTT 60
      aatgaaatGCTGacaaatgta 0.993  MARE.01
      atattTCAAatTt 0.956  CHR.01
      ttccaattT... 0.999  S8.01
      ttccaattT... 0.936  LHX3.02
      ttccaattT... 0.93  HMX3.02
      aaatTT... 0.93  HMX3.02
      aattT... 0.956  GSH2.01
      aattT... 0.961  BRIGHT.01
      tTT... 0.941  NKX61.02

human  AATTGACATTTAAATGTA CTT 76
mouse  AATTGACATTTAAATGCA CTT 76
fugu   AATTGACACCACGAGGCAGTT 81
...AATtgac 0.999  S8.01
...AATtgaca 0.936  LHX3.02
...AAttga 0.93  HMX3.02
...AAttgacat 0.93  HMX3.02
...AATtgacattta 0.956  GSH2.01
...AATtgaca 0.961  BRIGHT.01
...AAttgaca 0.941  NKX61.02
aatTGACattt 1  TGIF.01
ttgacatTTAAatgt 0.949  HMX3.02
acatTTAAatgtact 0.949  HMX3.02

```
