# Supplementary material for: Mouse Transgenesis Identifies Conserved Functional Enhancers and cis-Regulatory Motif in the Vertebrate LIM Homeobox Gene Lhx2 Locus
Source: PubMed Central journal article supplement (PMC3100342; doi:10.1371/journal.pone.0020088), 2011-05-23
Supplement: pone.0020088.s012.pdf [file pone.0020088.s012.pdf]

**Figure S10. Human-mouse-fugu alignment and predicted TFBS of CNE3.**

TFBS on the forward strand are shown in blue and TFBS on the reverse strand are shown in red below the human-mouse-fugu sequence alignment. The binding TF and position weight matrix similarity score are listed next to each predicted site.

```

human  ATTACGAT-----CAAGCACATTAATCCATTATTTCTTC-AGAATCTGACAGCCAATT 52
mouse  GTTACGAT-----CAAGCACATTAATCCATTACTTCTTC-AGAATCTGACAGCCAATT 52
fugu   GTTACCATTCAAATGCATGCTCATTAATCCATTAATTCATCTTGTTTTTGACAGCCAATT 60
      cacatTAATccat 0.913  TST1.01
      acatTAATccattattt 0.982  OTX2.01
      cattaatccATTAttc 0.959  BARX2.01
      atcTGACagcc 1  TGIF.01
      agccaaTT... 0.926  NKX61.01

human  AATA 56
mouse  AATA 56
fugu   AATA 64
      ...AAt 0.926  NKX61.01

```
