# Supplementary material for: Mouse Transgenesis Identifies Conserved Functional Enhancers and cis-Regulatory Motif in the Vertebrate LIM Homeobox Gene Lhx2 Locus
Source: PubMed Central journal article supplement (PMC3100342; doi:10.1371/journal.pone.0020088), 2011-05-23
Supplement: pone.0020088.s014.pdf [file pone.0020088.s014.pdf]

**Figure S12. Human-mouse-fugu alignment and predicted TFBS of CNE5.**

TFBS on the forward strand are shown in blue and TFBS on the reverse strand are shown in red below the human-mouse-fugu sequence alignment. The binding TF and position weight matrix similarity score are listed next to each predicted site.

```

human   TGTCCCCTCGGCCTCACAGCTCTGCCAGTTGGCAAACCCAAGCCAGGAAGTTGTCAATTC 60
mouse   TGTCCCCTCAGCCTTCCAGCACTGCCAGTTGGCAAACCCAAGCCAGGAAGTTGTCAATTC 60
fugu     TGTCCCTCTGCAACCCTACTCTGCCAGTTGGCAAAGGATATACCAGGAAACTGTCAGTGT 60
          tgtcccCTCggcc 0.919 MAZ.01
                    tctgccaGTTGgc 0.959 CMYB.01
                              ccaagccAGGAagttgtcaat 0.958 PEA3.01
                                  agttGTCAatt 1 TGIF.01

human   CAATTGCGTTTtagGCCATGTAGTCTATTAAAGAAGGCCTGCTGGTT-AAGGGGCGTCCT 119
mouse   CAATTGCGTTTtagGCCATGTAGTCTATTAAAGAAGGCCTGCTGGTT-AAGGGGCGTCCT 119
fugu     CTATTGAGTTTCGTAGAGGAACTCCTGCTAAAGCAGCCTTGCTGGTTCCAGGACCCAATT 120
          tctATTAaagaaggcc 0.994 HEX.01
                    agggCGTcct 0.953 WHN.01
                                  cct... 0.991 AREB6.04

human   CTGTTTCAAAGCATGGG 137
mouse   CTGTTTCAAAGCATGGG 137
fugu     CTGTTTCAAAGCATGGG 138
          ...ctGTTTcaa 0.991 AREB6.04

```
