# Supplementary material for: Mouse Transgenesis Identifies Conserved Functional Enhancers and cis-Regulatory Motif in the Vertebrate LIM Homeobox Gene Lhx2 Locus
Source: PubMed Central journal article supplement (PMC3100342; doi:10.1371/journal.pone.0020088), 2011-05-23
Supplement: pone.0020088.s016.pdf [file pone.0020088.s016.pdf]

**Figure S14. Human-mouse-fugu alignment and predicted TFBS of CNE7.**

TFBS on the forward strand are shown in blue and TFBS on the reverse strand are shown in red below the human-mouse-fugu sequence alignment. The binding TF and position weight matrix similarity score are listed next to each predicted site.

```
human TAACACCCCTCCAGGGAACATCTCCAGCCTGACCATATGGATCAGAGTGAA 51
mouse TAACACCCCTCCAGGGACCATCTCCAGCCTGACCATATGGATCAGAGTGAA 51
fugu TAACAGGCCCCCGGGACCCAGCACTGCAGGACCATATGGGGAGCAGTGAA 51
taacaccctccaGGGAacatct 0.925 OLF1.02
tccagGGAacatc 0.901 IK3.01
tccagcCTGAcca 0.918 MEF3.01
tgaCCATatggat 0.952 NEUROG.01
gaCCATatgga 0.963 SMARCA3.01
accatATGGat 0.967 SMARCA3.01
```
