# Supplementary material for: Mouse Transgenesis Identifies Conserved Functional Enhancers and cis-Regulatory Motif in the Vertebrate LIM Homeobox Gene Lhx2 Locus
Source: PubMed Central journal article supplement (PMC3100342; doi:10.1371/journal.pone.0020088), 2011-05-23
Supplement: pone.0020088.s017.pdf [file pone.0020088.s017.pdf]

**Figure S15. Human-mouse-fugu alignment and predicted TFBS of CNE8.**

TFBS on the forward strand are shown in blue and TFBS on the reverse strand are shown in red below the human-mouse-fugu sequence alignment. The binding TF and position weight matrix similarity score are listed next to each predicted site.

```

human   CCTTCATTTCTGTATAGCTGTGTTTGCCCTCAGGGCCACGCTGCTTGTGTTTGACAGTGGAT 60
mouse   CCTTCATTTCTGTATGGCTGTGTTTGCCCTCAGGGCCACGCTGCTTGTGTTTGACAGTGGAT 60
fugu    CTCTCACTGTTTCAGTGAATCGGCTTAGGGCCCTGCTGCTTGTGTTTGACAGAGCTT 60
          tttGCCTcagggcca 0.961 AP2.02
          gggCCACgctgct 0.959 ATF6.01
          tttTGACagtg 1 TGIF.01

human   CCCCCTAGATAGTTGGGATTAGTCGAGCTTGTTTAGATAAACTTGAA-----ATCAAG 113
mouse   CCCCCTAGATAGTTGGGATTAGTCGAGCTTGTTTAGATAAACTTGAA-----ATCAAG 113
fugu    CCCCT--GATAGTTAGGATTAGTCCAGCTTGTTTGGCTAAACTAGGAGAGGGGGATCTTA 118
          agatAGTTgggat 0.944 MYT1L.01
          atagtgggaTTAGtgc 0.969 PTX1.01
          agttGGGAttagt 0.98 IK2.01
          tggGATTagtgc 1 TFII-IR4.01
          gagcttgTTTAgataaa 0.927 HFH1.01
          ttaGATAaactt 0.95 GATA1.03
          tgaA-----ATCaag... 0.963 GF11.01

human   GCCTTCT 120
mouse   GCCTTCT 120
fugu    GGCTACT 125
          ...gcctt 0.963 GF11.01

```
