# Supplementary material for: Mouse Transgenesis Identifies Conserved Functional Enhancers and cis-Regulatory Motif in the Vertebrate LIM Homeobox Gene Lhx2 Locus
Source: PubMed Central journal article supplement (PMC3100342; doi:10.1371/journal.pone.0020088), 2011-05-23
Supplement: pone.0020088.s018.pdf [file pone.0020088.s018.pdf]

**Figure S16. Human-mouse-fugu alignment and predicted TFBS of CNE9.**

TFBS on the forward strand are shown in blue and TFBS on the reverse strand are shown in red below the human-mouse-fugu sequence alignment. The binding TF and position weight matrix similarity score are listed next to each predicted site.

|       |                                                        |    |
|-------|--------------------------------------------------------|----|
| human | CTGCTCATTACTTCTTCCTTCTGTATCGAGACCCTTATTTACATTTTCAGATTA | 53 |
| mouse | CTGCTCATTACTTCTTCTTTCTGTATCAAGACCCTTATTTACATTTTCAGATTA | 53 |
| fugu  | CTGCTCATTAGTCTATCGCTTGGATCAAACGCTGTATTTACATATCAAATTA   | 53 |
|       | acccttaTTAcatttc 0.948 XFD1.01                         |    |
